# Supplementary material
Source: PubMed Central journal article supplement (PMC3955738)

# Liposome Surface Functionalization Based on Different Anchoring Lipids via Staudinger Ligation

Pratima Vabbilisetty and Xue-Long Sun\*

## Supporting Information

<sup>1</sup>H NMR spectrum of Cholesterol-PEG<sub>2000</sub> – TP conjugate (in CDCl<sub>3</sub>)

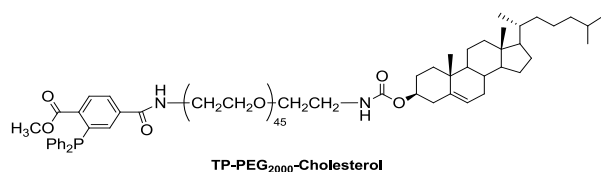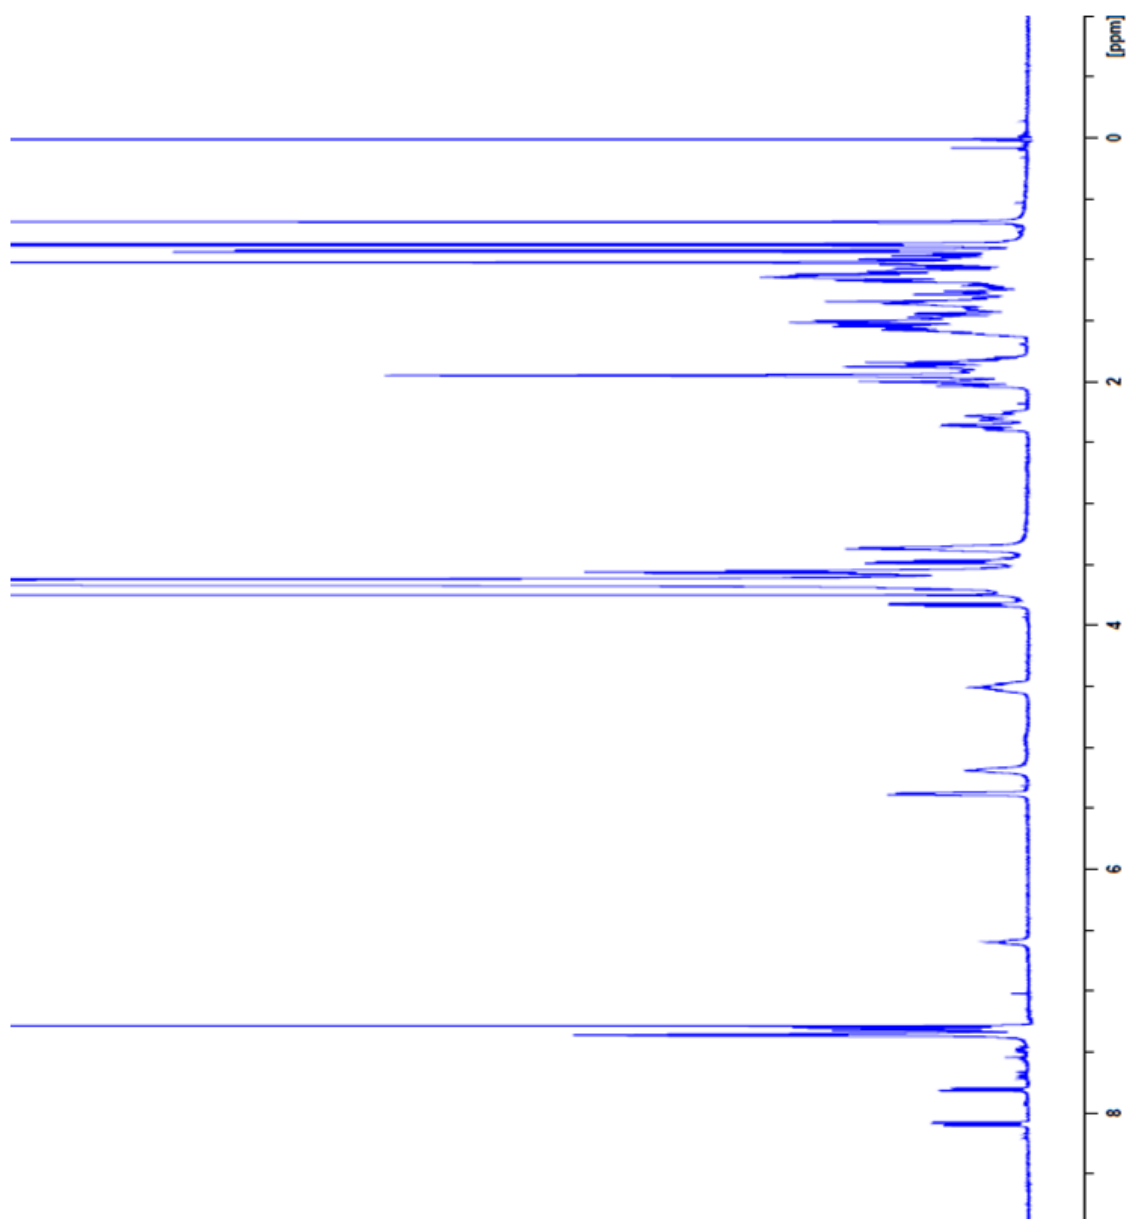

<sup>13</sup>C NMR spectrum of Cholesterol-PEG<sub>2000</sub> – TP conjugate (in CDCl<sub>3</sub>)

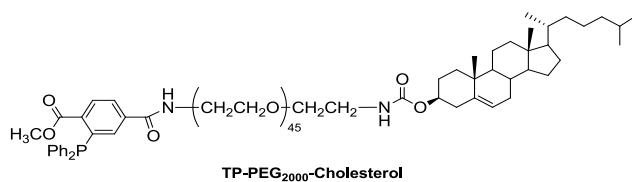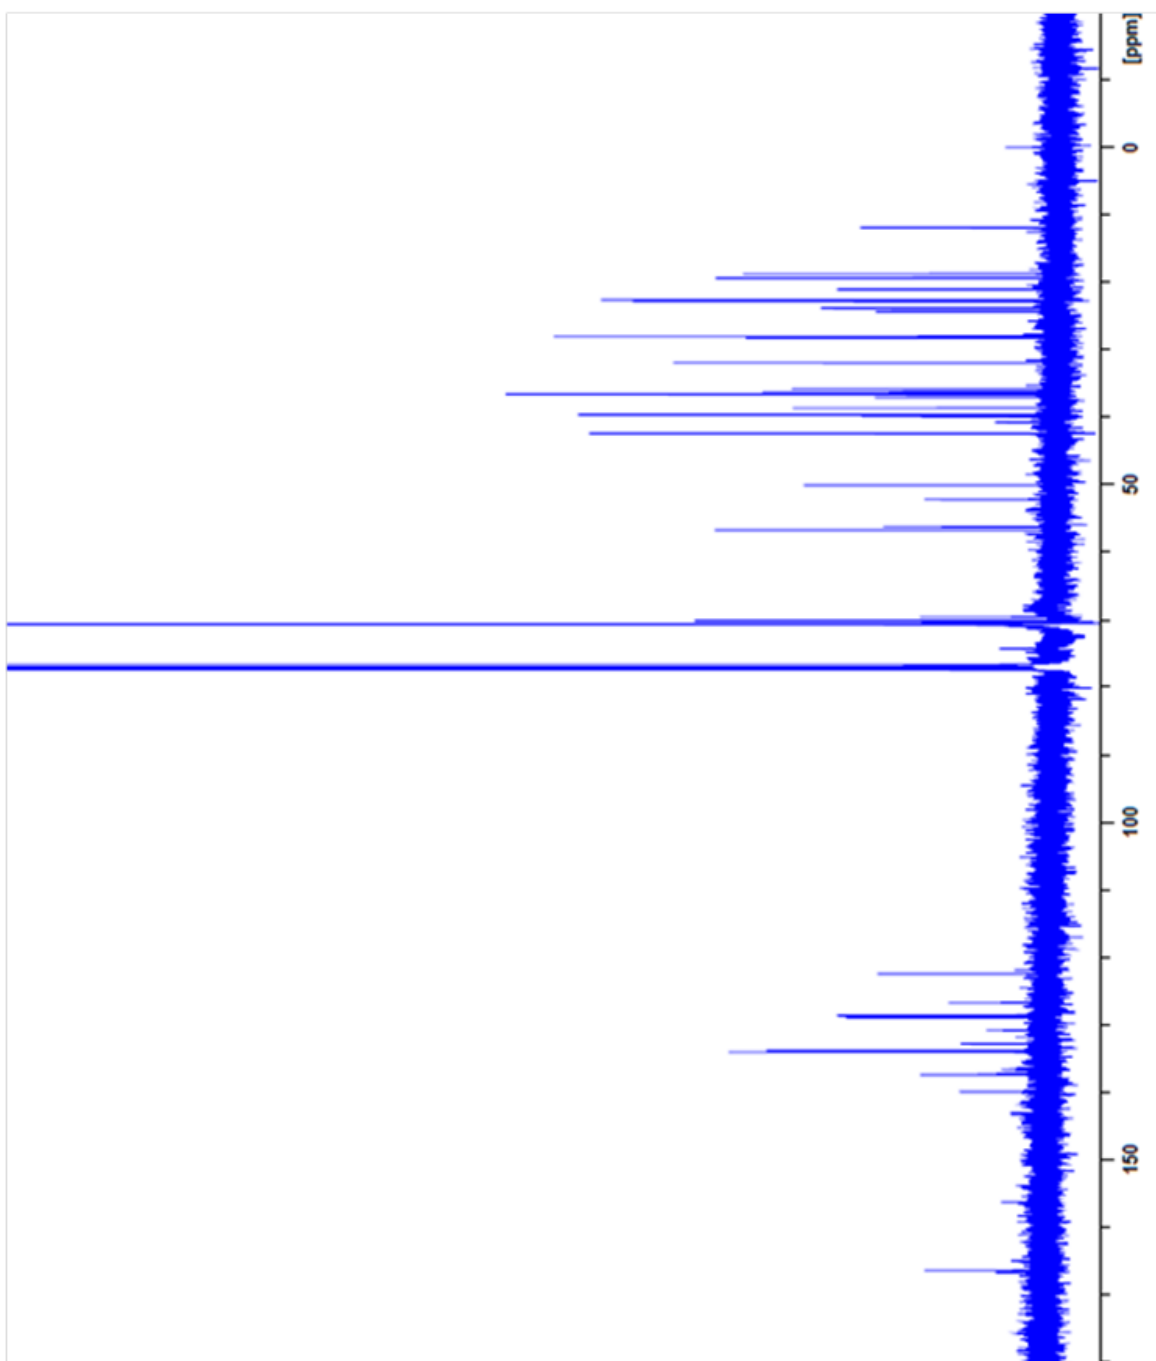

$^{31}\text{P}$  NMR spectrum of Cholesterol-PEG<sub>2000</sub> – TP conjugate (in CDCl<sub>3</sub>)

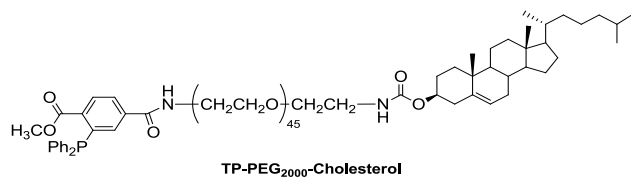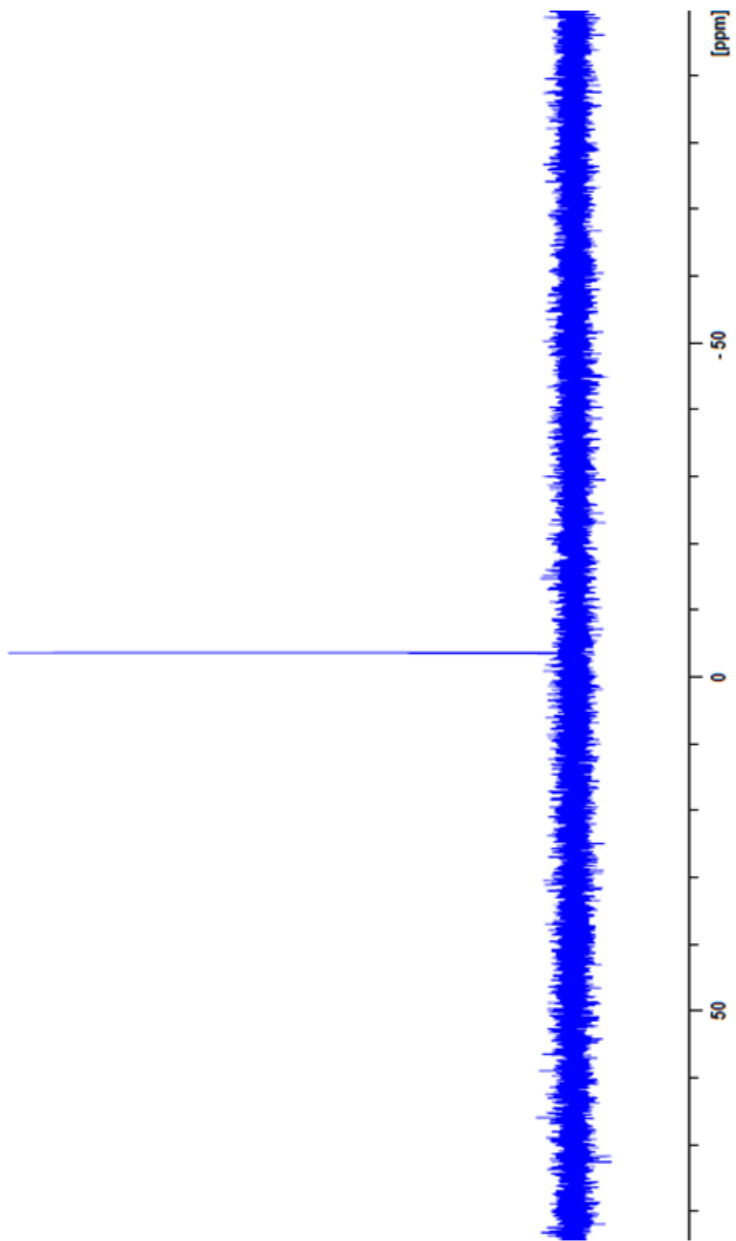





$^{31}\text{P}$  NMR spectrum of DSPE-PEG<sub>2000</sub> – TP conjugate (in CDCl<sub>3</sub>)

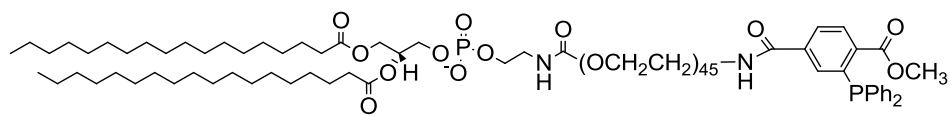

DSPE-PEG<sub>2000</sub> - TP

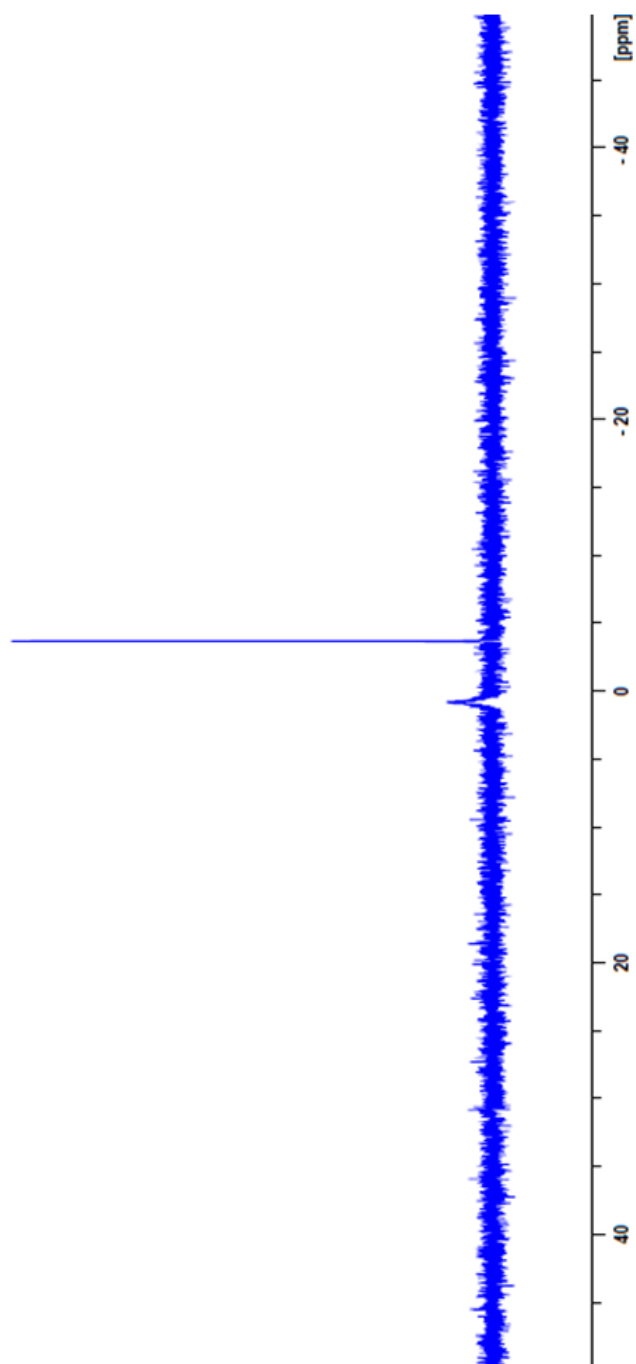

Measurement of critical micelle concentration (CMC) of anchor lipids before and after glyco-functionalization: Cholesterol – PEG<sub>2000</sub> – TP (A) and DSPE-PEG<sub>2000</sub>-TP (B).

A1: Cholesterol-PEG<sub>2000</sub>-TP

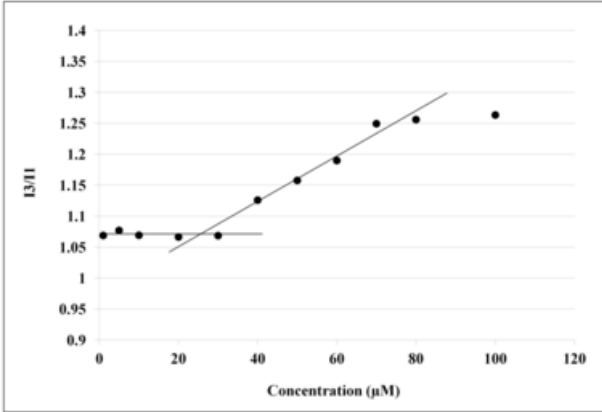

B1: DSPE-PEG<sub>2000</sub>-TP

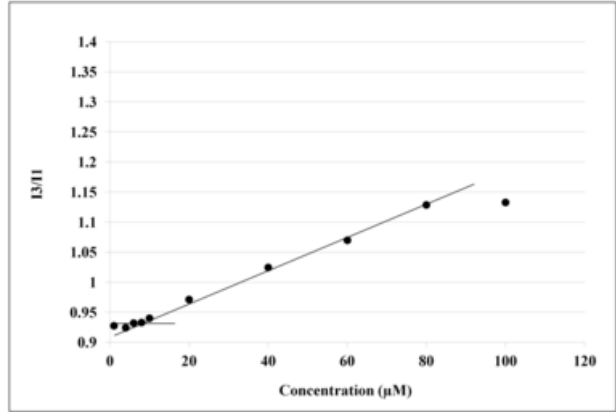

A2: Cholesterol-PEG<sub>2000</sub>-TP + Lactose

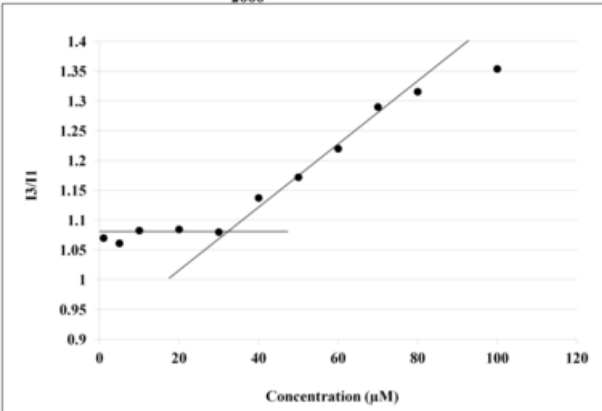

B2: DSPE-PEG<sub>2000</sub>-TP + Lactose

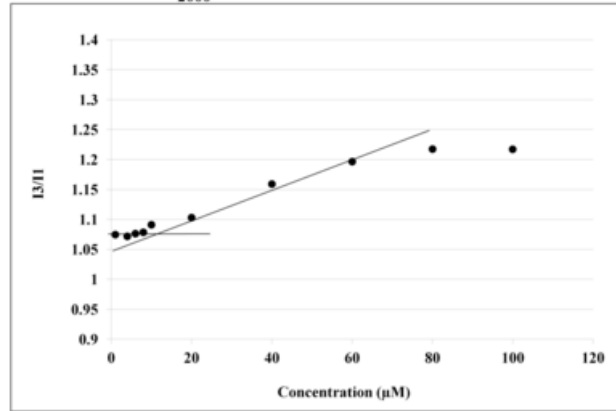

Determination of concentration of lactose on the liposome surface

Lactose assay calibration curve:

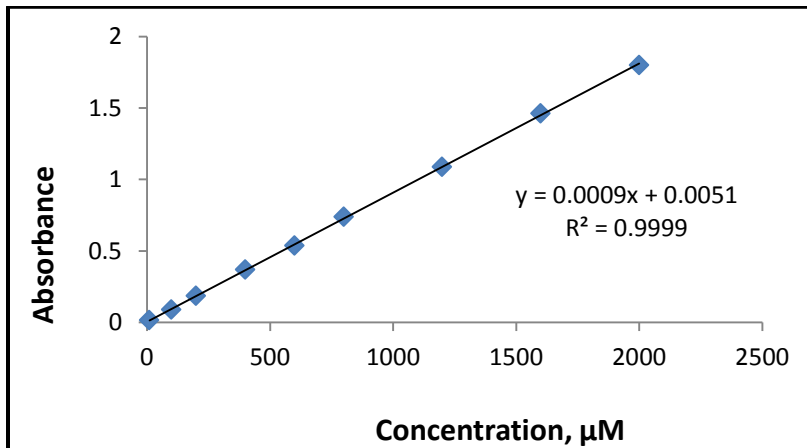

**5, 6-Carboxyfluorescein dye leakage assay:**  
5, 6-CF calibration curve:

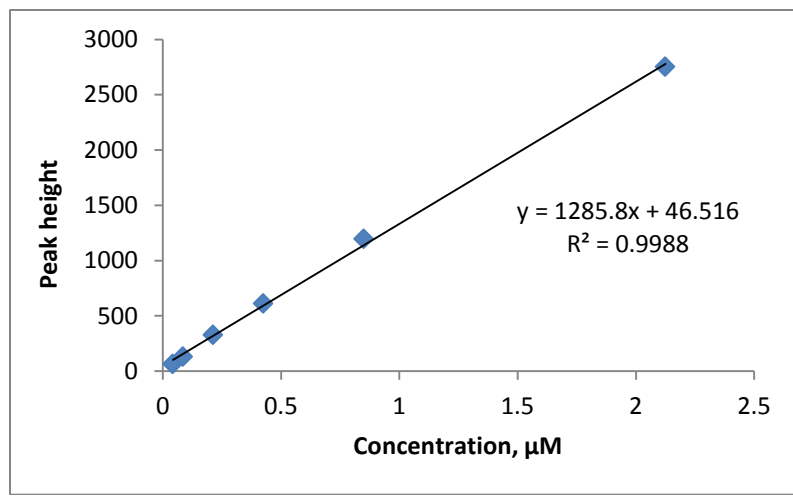

Supplement: NIHMS556978-supplement-Supplementary_Information.pdf [file NIHMS556978-supplement-Supplementary_Information.pdf]
